# Supplementary material for: Large deletions perturb peripheral transcriptomic and metabolomic profiles in Phelan-McDermid syndrome
Source: bioRxiv or medRxiv preprint supplement (doi:10.1101/2022.07.06.22277334), 2022-07-10
Supplement: Supplementary file [file media-1.pdf]

## **Large deletions perturb peripheral transcriptomic and metabolomic profiles in Phelan-McDermid syndrome**

Michael S. Breen<sup>1,2,3,4\*</sup>, Xuanjia Fan<sup>1,2</sup>, Tess Levy<sup>1,2</sup>, Rebecca Pollak<sup>1,2</sup>, Brett Collins<sup>1,2</sup>, Aya Osman<sup>1,2</sup>, Anna S. Tocheva<sup>3,5</sup>, Mustafa Sahin<sup>6,7</sup>, Elizabeth Berry-Kravis<sup>8,9,10</sup>, Latha Soorya<sup>10</sup>, Audrey Thurm<sup>11</sup>, Craig M. Powell<sup>12,13</sup>, Jonathan A. Bernstein<sup>14</sup>, Alexander Kolevzon<sup>1,2,15</sup>, Joseph D. Buxbaum<sup>1,2,3,4,16,17\*</sup> on behalf of the Developmental Synaptopathies Consortium

<sup>1</sup>Seaver Autism Center for Research and Treatment, Icahn School of Medicine at Mount Sinai, New York, NY

<sup>2</sup>Department of Psychiatry, Icahn School of Medicine at Mount Sinai, New York, NY

<sup>3</sup>Department of Genetics and Genomic Sciences, Icahn School of Medicine at Mount Sinai, New York, NY

<sup>4</sup>Mindich Child Health and Development Institute, Icahn School of Medicine at Mount Sinai, New York, NY

<sup>5</sup>Precision Immunology Institute, Icahn School of Medicine at Mount Sinai, New York, NY

<sup>6</sup>Department of Neurology, Boston Children's Hospital, Harvard Medical School, Boston, MA

<sup>7</sup>F.M. Kirby Neurobiology Center, Boston Children's Hospital, Harvard Medical School, Boston, MA

<sup>8</sup>Department of Pediatrics, Rush University Medical Center, Chicago, IL

<sup>9</sup>Department of Neurological Sciences, Rush University Medical Center, Chicago, IL

<sup>10</sup>Department of Psychiatry, Rush University Medical Center, Chicago, IL

<sup>11</sup>Neurodevelopmental and Behavioral Phenotyping Service, National Institute of Mental Health, National Institutes of Health, Bethesda, MD

<sup>12</sup>Department of Neurobiology, University of Alabama at Birmingham School of Medicine, Birmingham, AL

<sup>13</sup>Civitan International Research Center, University of Alabama at Birmingham School of Medicine, Birmingham, AL

<sup>14</sup>Department of Pediatrics, Stanford University School of Medicine, Stanford, CA

<sup>15</sup>Department of Pediatrics, Icahn School of Medicine at Mount Sinai, New York, NY

<sup>16</sup>Department of Neuroscience, Icahn School of Medicine at Mount Sinai, New York, NY

<sup>17</sup>Friedman Brain Institute, Icahn School of Medicine at Mount Sinai, New York, NY

### **\* Correspondence to:**

Michael S. Breen - [michael.breen@mssm.edu](mailto:michael.breen@mssm.edu)

Joseph D. Buxbaum - [joseph.buxbaum@mssm.edu](mailto:joseph.buxbaum@mssm.edu)

### **Supplemental figures and legends:**

Supplemental Figure 1. Landscape of *SHANK3* sequence variants in the current study.

Supplemental Figure 2. Characterization of 22q13.3 breakpoints and disrupted genes.

Supplemental Figure 3. Overlap of differentially expressed genes at FDR < 5%.

Supplemental Figure 4. Direct protein-protein interaction (PPI) network.

Supplemental Figure 5. CD56+ NK cell enrichment gene set enrichment.

Supplemental Figure 6. CD56+ NK cell-specific expression via scRNA-seq.

Supplemental Figure 7. Gene expression on 22q13.3 that predicts *SIPR5* expression.

Supplemental Figure 8. Exploratory analysis of phenotype-transcriptome associations.

Supplemental Figure 9. Metabolites associated with Class II mutations.



**Supplemental Figure 1. Landscape of *SHANK3* sequence variants in the current study.** Recurrent mutations are indicated in black, missense in red and splice site variants in blue. Protein domains are from UniProt; the homer and cortactin binding sites are indicated as previously reported.







**Supplemental Figure 4. Direct protein-protein interaction (PPI) network.** All 52 genes on 22q13.3 and differentially expressed genes (FDR < 5%) associated with PMS participants with Class II mutations were tested for enrichment of direct PPIs. The network contained significantly higher connectivity than expected by chance ( $p < 1.0e-16$ ). Nodes are colored by under-expressed genes (red), over-expressed genes (blue), and disrupted genes on 22q13.3 (pink). Yellow background is given to genes on 22q13.3 found to interact with differentially expressed genes.



**Supplemental Figure 5. CD56+ NK cell enrichment gene set enrichment.** CAMERA gene-set enrichment results for differentially expressed genes associated with (A) Class II mutations and (B) Class I mutations. Enrichment was tested for 190 genes that are differentially expressed CD56+ NK cells compared to all other cell types in the scRNA-seq experiment. (C) Unsupervised clustering of 25 CD56+ NK cell-specific genes distinguishes 82% (n=29) of Class II mutations from remaining samples. (D) The total number of significant differentially expressed genes in participants with Class II mutations (FDR < 5%) after adjusting for different covariates, reveals adjusting for CD56+ NK cell frequencies results in loss of ~69% of Class II-related DEGs.



**Supplemental Figure 6. CD56+ NK cell-specific expression via scRNA-seq.** TSNE clustering and cell type identification of eight main immune cell types across three independent studies: **(A)** the first dataset comprised of 10,975 PBMCs (v2 Chemistry); **(D)** the second dataset comprised of 33,227 PBMCs (v2 Chemistry), both were downloaded from the list of publically available 10X Genomic Inc. datasets; **(F)** third data set was comprised of 67,272 PBMCs and was obtained from Zheng et al., 2017<sup>28</sup>. Next, the normalized and scaled scRNA-seq expression data was used to create an eigenvalue (per cell) of 208 significantly under-expressed genes in participants with Class II mutations, which was projected onto each TSNE and color coded to illustrate high expression of these genes in CD56+ NK cells (blue=low, red=high) **(B, E, G, respectively)**. **(C)** For clarity, eigenvalues (x-axis) were plotted as a violin plot for each cell type (y-axis) to illustrate strength of enrichment (merging CD14+ and CD16+ monocytes).



**Supplemental Figure 7. Gene expression on 22q13.3 that predicts *SIPR5* expression.** (A) Barplots depicting the Pearson's correlation coefficient (y-axis) between gene expression of the 52 blood expressed genes on 22q13.3 number relative to *SIPR5* expression. *CERK* is denoted with an arrow. (B) The top three genes on 22q13.3 with the highest associations (y-axis) with *SIPR5* expression (x-axis) are depicted. (C) We anticipated that by parsing PMS participants with Class II mutations spanning *MLC1*, *TTC38*, and *CERK*, respectively, that those individuals would display lower expression of *SIPR5* relative to the remaining of individuals with Class II mutations. We found that only participants with Class II mutations spanning *CERK* were predictive of *SIPR5* expression, in that reduced expression of this gene was evident when compared with the remaining Class II mutations. An analysis of variance (AOV) was used to test for significance.





**Supplemental Figure 8. Exploratory analysis of phenotype-transcriptome associations.** Barplots depicting the total number of genes positively (red) and negatively (blue) associated with each clinical measure presented in **Table 1** according to **(A)** a FDR < 10% and **(Bi)** a nominal  $p$ -value < 0.05. **(Bii)** Pearson's correlation matrix among all clinical traits in the current study (red=high; blue=low; \*=significant association). **(C)** Functional annotation of genes positively and negatively associated with ABC-lethargy (social withdrawal). **(D)** To conceptualize these associations, all positively and negatively associated genes were summarized into one singular value using singular value decomposition, respectively. Probands were partitioned into tertiles according to ABC-lethargy scores and the resulting eigenvalues were plotted across low (1<sup>st</sup> tertile) to high (3<sup>rd</sup> tertile) scores confirming significant positive and negative associations. **(E)** Gene set enrichment analysis shows a significant enrichment of disease risk genes for intellectual disability (ID), schizophrenia (SCZ), autism spectrum disorder (ASD) and educational attainment (EA) among genes negatively associated with ABC-lethargy. Significance was calculated using a Fisher's exact test relative to a genome background of genes expressed in the current study.



**Supplemental Figure 9. Metabolites associated with Class II mutations.** Twenty-four differentially abundant metabolites significantly associated with Class II mutations relative to controls (FDR < 10%) are displayed. Scaled metabolite abundance (y-axes) was partitioned by deletion group (x-axes). The y-axis labels indicate compound identifiers and the main titles indicate the biochemical identifiers.
